# Supplementary material for: Enrichment of the Information Extracted From Hyperspectral Reflectance Images for Noninvasive Phenotyping
Source: Preprints.org preprint supplement (doi:10.20944/preprints202112.0325.v1), 2021-12-21
Supplement: Supplementary file 1 [file supplementary]

|  |  |
| --- | --- |
| (**a**) | (**b**) |

**Figure S1.** Changes in the average values of the indicative of leaf tissue senescence index PSRI during (a) storage of and (b) decline of [Chl] (indicative of leaf discoloration) in the stored non-sealed (closed symbols) and sealed (open symbols) fresh-cut lettuce leaves (according to [37])
